# Supplementary material for: Genome-Wide Association Study Reveals the Genetic Basis of Kernel and Cob Moisture Changes in Maize at Physiological Maturity Stage
Source: MDPI journal article supplement (doi:10.3390/plants11151989), 2022-07-30
Supplement: s1 [file s1]

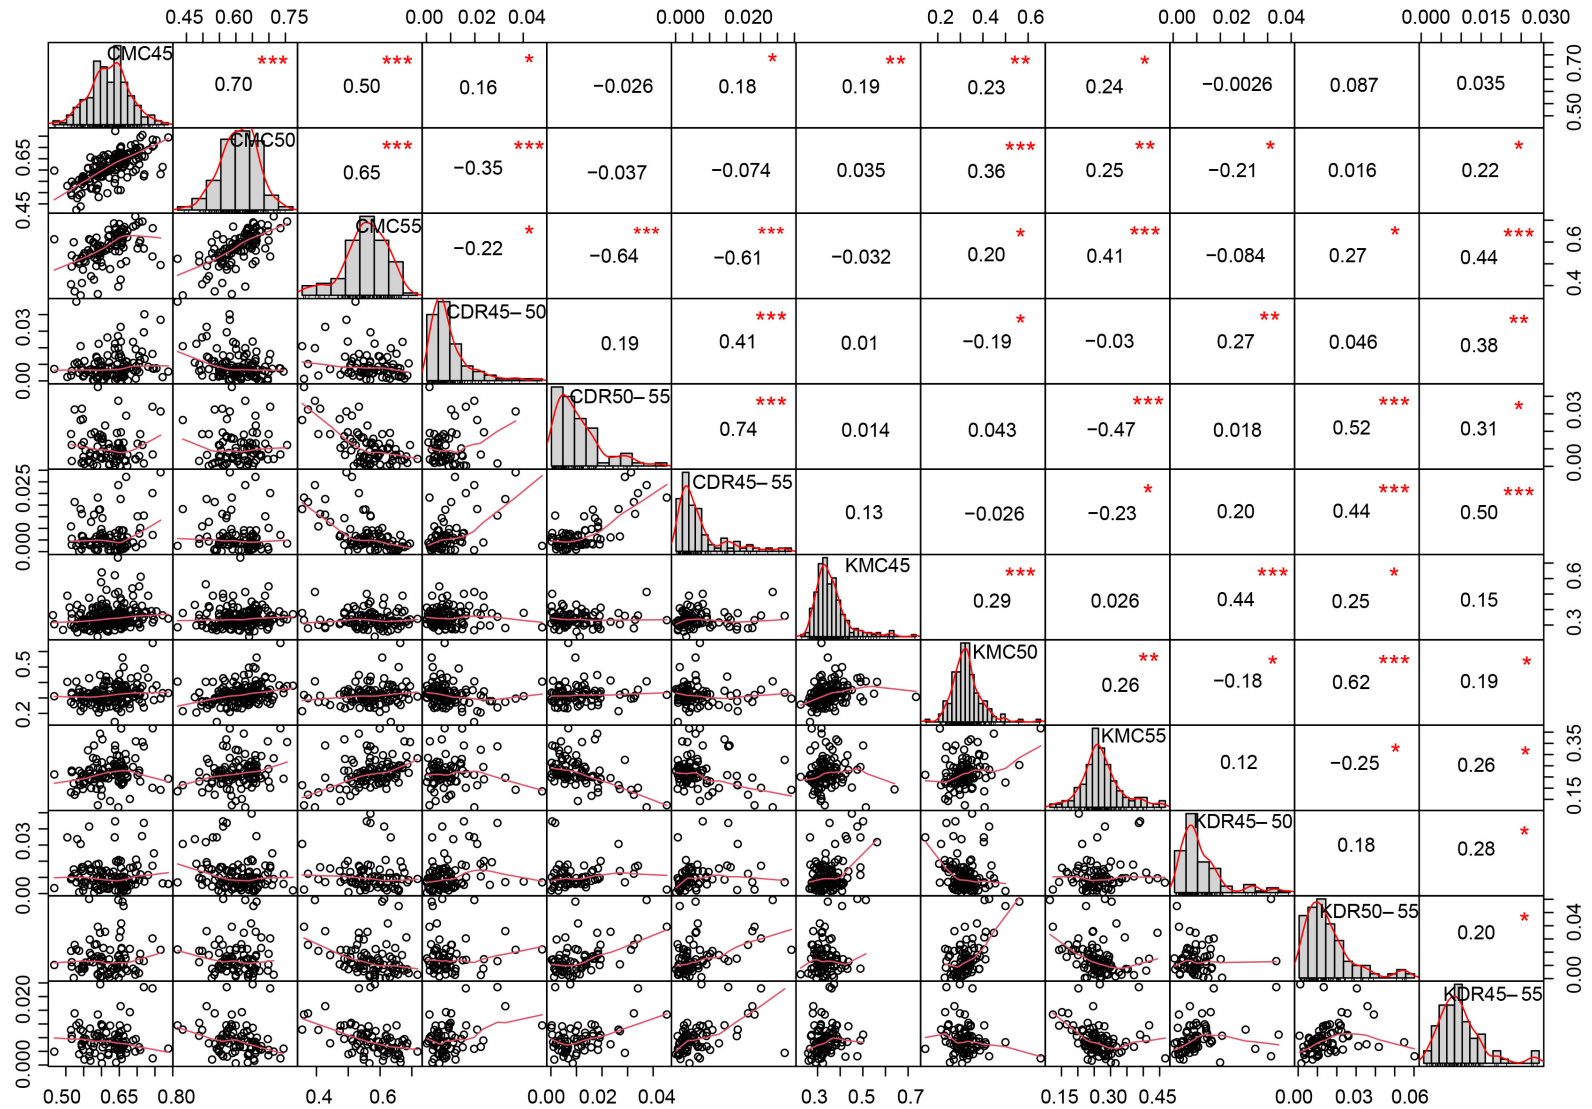

**Figure S1** The phenotypic distributions of 12 collected traits at different time points. The CMC45, CMC50, and CMC55 represent cob moisture content on the 45<sup>th</sup>, 50<sup>th</sup>, and 55<sup>th</sup> days after pollination, respectively. The CDR45-50, CDR50-55, and CDR45-55 represent cob dehydration rate of three time spans: 45-50, 50-55, and 45-55 days after pollination, respectively. The KMC45, KMC50, and KMC55 represent kernel moisture content on the 45<sup>th</sup>, 50<sup>th</sup>, and 55<sup>th</sup> days after pollination, respectively. The KDR45-50, KDR50-55, and KDR45-55 represent kernel dehydration rate of three time spans: 45-50, 50-55, and 45-55 days after pollination, respectively. \*P = 0.05, \*\*P = 0.01, \*\*\*P = 0.001.

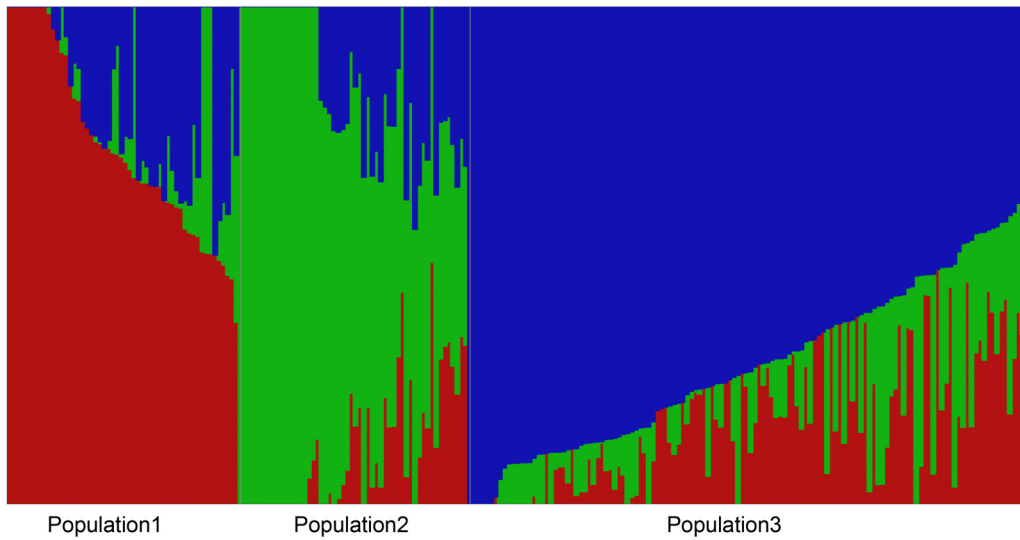

**Figure S2** Population structure of 241 maize inbred lines estimated from 46,603 SNPs. Population 1, population 2, and population 3 represent tropical group, non-stiff stalk (NSS) group, and stiff stalk (SS) group, respectively.

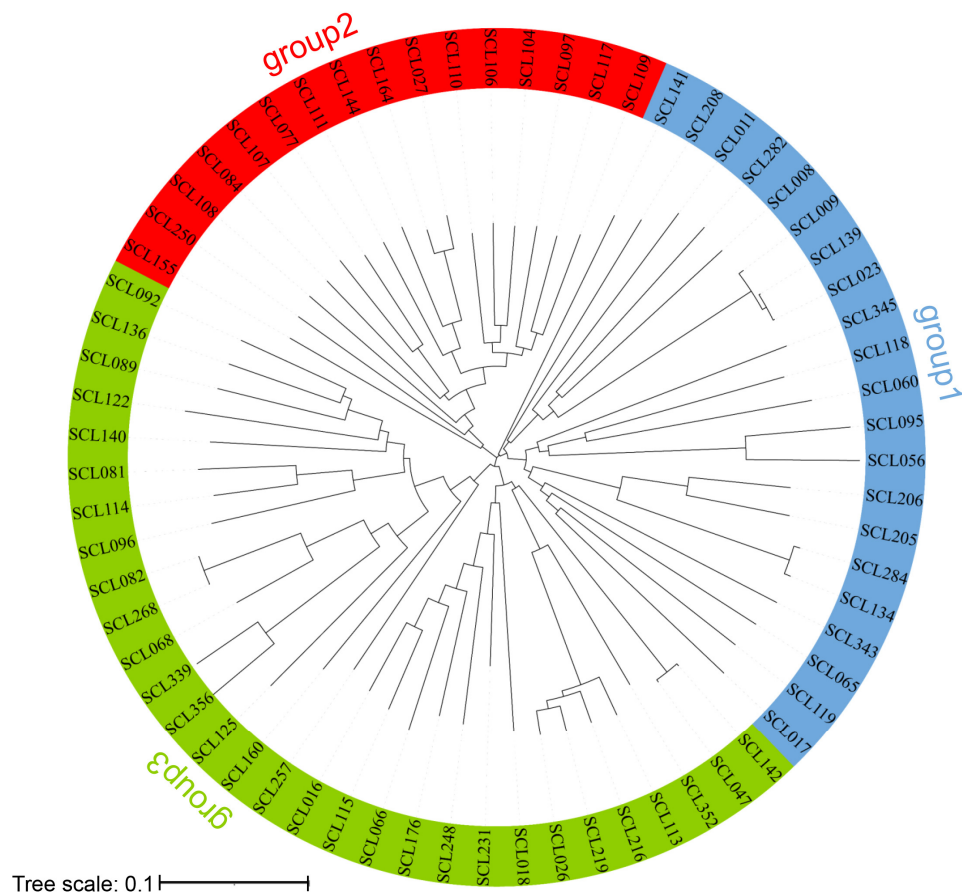

**Figure S3** Phylogenetic tree of 67 maize inbred lines. The group 1, group 2, and group 3 represent tropical group, non-stiff stalk (NSS) group and stiff stalk (SS) group, respectively.

**Table S1** Significant SNPs detected by GWAS using FarmCPU

| Trait    | SNP           | Chromosome | Position (bp) | P-value  | Effect |
|----------|---------------|------------|---------------|----------|--------|
| CDR45–55 | SYN38588      | 7          | 121316500     | 9.58E-11 | -0.005 |
|          | SYN11290      | 2          | 70284631      | 1.8E-09  | -0.005 |
|          | SYN30412      | 5          | 20908120      | 1.37E-07 | -0.003 |
|          | PZE-103097076 | 3          | 156937084     | 6.1E-07  | 0.003  |
| CDR50–55 | SYN38588      | 7          | 121316500     | 2.1E-09  | -0.005 |
|          | PZE-102053209 | 2          | 30811954      | 2.39E-09 | 0.005  |
|          | PZE-101122473 | 1          | 152107078     | 4.9E-09  | 0.004  |
| KMC45    | PZB01400.1    | 1          | 286449514     | 3.19E-07 | 0.031  |
|          | SYN15586      | 1          | 280706296     | 5.87E-07 | 0.041  |
|          | SYN8680       | 1          | 283601391     | 9.87E-07 | 0.033  |

CDR45–55 and CDR50–55 represent cob dehydration rate on the 45–55 and 50–55 days after pollination, respectively. KMC45 represent kernel moisture content on the 45th days after pollination.

**Table S2** Annotations of candidate genes based on B73 (RefGen\_v4) genome.

| Trait    | Candidate Gene        | Chromosome | Annotation                                               |
|----------|-----------------------|------------|----------------------------------------------------------|
| CDR45–55 | <i>Zm00001d003958</i> | 2          | -                                                        |
|          | <i>Zm00001d003957</i> | 2          | -                                                        |
|          | <i>Zm00001d003950</i> | 2          | major facilitator superfamily protein                    |
|          | <i>Zm00001d003962</i> | 2          | -                                                        |
|          | <i>Zm00001d003961</i> | 2          | -                                                        |
|          | <i>Zm00001d013818</i> | 5          | tyrosine N-monooxygenase                                 |
|          | <i>Zm00001d013820</i> | 5          | -                                                        |
|          | <i>Zm00001d013814</i> | 5          | pentatricopeptide repeat-containing protein              |
|          | <i>Zm00001d038319</i> | 5          | COV1-like protein                                        |
|          | <i>Zm00001d013816</i> | 5          | DTW domain-containing protein                            |
|          | <i>Zm00001d013828</i> | 5          | -                                                        |
|          | <i>Zm00001d013824</i> | 5          | -                                                        |
|          | <i>Zm00001d013819</i> | 5          | -                                                        |
|          | <i>Zm00001d013817</i> | 5          | -                                                        |
|          | <i>Zm00001d013825</i> | 5          | -                                                        |
|          | <i>Zm00001d038318</i> | 5          | -                                                        |
|          | <i>Zm00001d013812</i> | 5          | polyadenylate-binding protein RBP45C                     |
|          | <i>Zm00001d042276</i> | 3          | -                                                        |
|          | <i>Zm00001d042281</i> | 3          | -                                                        |
|          | <i>Zm00001d042279</i> | 3          | -                                                        |
|          | <i>Zm00001d042269</i> | 3          | DNAJ heat shock N-terminal domain-containing protein     |
|          | <i>Zm00001d042274</i> | 3          | -                                                        |
|          | <i>Zm00001d042268</i> | 3          | receptor-like protein kinase 5                           |
|          | <i>Zm00001d042275</i> | 3          | phosphatidylinositol transfer protein CSR1               |
|          | <i>Zm00001d042271</i> | 3          | -                                                        |
|          | <i>Zm00001d042272</i> | 3          | histone-lysine N-methyltransferase family protein        |
|          | <i>Zm00001d042270</i> | 3          | heavy metal transport/detoxification superfamily protein |
|          | <i>Zm00001d042284</i> | 3          | -                                                        |
|          | <i>Zm00001d042278</i> | 3          | phytanoyl-CoA dioxygenase 2                              |
| CDR50–55 | <i>Zm00001d003107</i> | 2          | -                                                        |
|          | <i>Zm00001d003109</i> | 2          | alpha-12-glucosyltransferase                             |
|          | <i>Zm00001d003108</i> | 2          | adenine phosphoribosyltransferase 1                      |

|       |                       |   |                                                                       |
|-------|-----------------------|---|-----------------------------------------------------------------------|
| KMC45 | <i>Zm00001d003104</i> | 2 | srostein binding protein                                              |
|       | <i>Zm00001d003099</i> | 2 | serinc-domain containing serine and sphingolipid biosynthesis protein |
|       | <i>Zm00001d003102</i> | 2 | cytokinin-O-glucosyltransferase 3                                     |
|       | <i>Zm00001d003103</i> | 2 | -                                                                     |
|       | <i>Zm00001d003101</i> | 2 | -                                                                     |
|       | <i>Zm00001d003106</i> | 2 | -                                                                     |
|       | <i>Zm00001d003110</i> | 2 | -                                                                     |
|       | <i>Zm00001d030697</i> | 1 | -                                                                     |
|       | <i>Zm00001d030698</i> | 1 | -                                                                     |
|       | <i>Zm00001d034383</i> | 1 | -                                                                     |
|       | <i>Zm00001d034388</i> | 1 | indole-3-acetaldehyde oxidase-like                                    |
|       | <i>Zm00001d034386</i> | 1 | GATA transcription factor 2-like                                      |
|       | <i>Zm00001d034396</i> | 1 | mavicyanin                                                            |
|       | <i>Zm00001d034400</i> | 1 | -                                                                     |
|       | <i>Zm00001d034399</i> | 1 | -                                                                     |
|       | <i>Zm00001d034379</i> | 1 | -                                                                     |
|       | <i>Zm00001d034380</i> | 1 | -                                                                     |
|       | <i>Zm00001d034387</i> | 1 | -                                                                     |
|       | <i>Zm00001d034401</i> | 1 | chloroplastic zinc metalloprotease EGY1                               |
|       | <i>Zm00001d034382</i> | 1 | -                                                                     |
|       | <i>Zm00001d034188</i> | 1 | cold-regulated 413 plasma membrane protein 2                          |
|       | <i>Zm00001d034175</i> | 1 | -                                                                     |
|       | <i>Zm00001d034189</i> | 1 | CASP-like protein 12                                                  |
|       | <i>Zm00001d034180</i> | 1 | seven transmembrane domain protein                                    |
|       | <i>Zm00001d034186</i> | 1 | allene-oxide synthase 3                                               |
|       | <i>Zm00001d034181</i> | 1 | -                                                                     |
|       | <i>Zm00001d034167</i> | 1 | -                                                                     |
|       | <i>Zm00001d034179</i> | 1 | nuclear pore complex protein NUP58                                    |
|       | <i>Zm00001d034164</i> | 1 | plastoquinol-plastocyanin reductase                                   |
|       | <i>Zm00001d034183</i> | 1 | serine/threonine-protein kinase 12                                    |
|       | <i>Zm00001d034178</i> | 1 | -                                                                     |
|       | <i>Zm00001d034184</i> | 1 | pyridoxal phosphate (PLP)-dependent transferase superfamily           |
|       | <i>Zm00001d034182</i> | 1 | allene-oxide synthase 4                                               |
|       | <i>Zm00001d034173</i> | 1 | -                                                                     |
|       | <i>Zm00001d034301</i> | 1 | -                                                                     |
|       | <i>Zm00001d034279</i> | 1 | -                                                                     |

|                       |   |                                                             |
|-----------------------|---|-------------------------------------------------------------|
| <i>Zm00001d034305</i> | 1 | -                                                           |
| <i>Zm00001d034298</i> | 1 | transcription factor phytochrome interacting factor-like 13 |
| <i>Zm00001d034283</i> | 1 | photosystem I reaction center subunit III                   |
| <i>Zm00001d034312</i> | 1 | -                                                           |
| <i>Zm00001d034286</i> | 1 | -                                                           |
| <i>Zm00001d034314</i> | 1 | transcription initiation factor TFIID subunit 7             |
| <i>Zm00001d034313</i> | 1 | seed maturation protein                                     |
| <i>Zm00001d034307</i> | 1 | -                                                           |

---

CDR45–55 and CDR50–55 represent cob dehydration rate on the 45–55 and 50–55 days after pollination, respectively. KMC45 represents kernel moisture content on the 45th, 50th, and 55th days after pollination, respectively. ‘-’ represents no functional annotations.

**Table S3** Homologous annotations of 11 unknown genes

| Candidate gene        | Homologous gene          | Annotation                                                             |
|-----------------------|--------------------------|------------------------------------------------------------------------|
| <i>Zm00001d020618</i> | <i>OSNPB_090439700</i>   | transmembrane protein 87A ( <i>Oryza sativa</i> )                      |
| <i>Zm00001d020610</i> | <i>OSNPB_090438000</i>   | respiratory burst oxidase homolog protein E<br>( <i>Oryza sativa</i> ) |
| <i>Zm00001d020609</i> | -                        | -                                                                      |
| <i>Zm00001d020612</i> | <i>OSNPB_090438400</i>   | probable ethanolamine kinase ( <i>Oryza sativa</i> )                   |
| <i>Zm00001d020622</i> | -                        | -                                                                      |
| <i>Zm00001d020626</i> | -                        | -                                                                      |
| <i>Zm00001d020613</i> | <i>PVAP13_2NG338900</i>  | translation initiation factor IF-2-like<br>( <i>Panicum virgatum</i> ) |
| <i>Zm00001d020614</i> | <i>SORBI_3002G214800</i> | bicolor protein TIFY 10c ( <i>Sorghum bicolor</i> )                    |
| <i>Zm00001d020616</i> | -                        | -                                                                      |
| <i>Zm00001d020627</i> | <i>OSNPB_090441000</i>   | subtilisin-like protease precursor ( <i>Oryza sativa</i> )             |
| <i>Zm00001d020620</i> | -                        | -                                                                      |

‘-’ represents no homologous or annotations.

**Table S4** Details of 38 variations detected in two genes

| Gene                  | Marker       | Variation Position | Variation Type |
|-----------------------|--------------|--------------------|----------------|
| <i>Zm00001d020615</i> | S7_125162271 | 125162271          | G/A            |
|                       | S7_125162276 | 125162276          | G/A            |
|                       | S7_125162319 | 125162319          | C/A            |
|                       | S7_125162440 | 125162440          | T/C            |
|                       | S7_125162448 | 125162448          | A/T            |
|                       | S7_125162603 | 125162603          | G/A            |
|                       | S7_125162646 | 125162646          | C/T            |
|                       | S7_125162869 | 125162869          | -/C            |
|                       | S7_125162886 | 125162886          | C/T            |
|                       | S7_125163651 | 125163651          | C/-            |
|                       | S7_125164549 | 125164549          | T/C            |
|                       | S7_125164562 | 125164562          | A/G            |
|                       | S7_125164643 | 125164643          | C/T            |
|                       | S7_125165041 | 125165041          | T/C            |
|                       | S7_125165056 | 125165056          | T/C            |
|                       | S7_125165191 | 125165191          | G/A            |
|                       | S7_125165529 | 125165529          | T/C            |
|                       | S7_125165553 | 125165553          | T/C            |
|                       | S7_125165963 | 125165963          | A/G            |
|                       | S7_125166026 | 125166026          | G/C            |
|                       | S7_125166053 | 125166053          | C/T            |
|                       | S7_125166137 | 125166137          | G/A            |
|                       | S7_125166170 | 125166170          | G/T            |
|                       | S7_125166242 | 125166242          | C/T            |
|                       | S7_125166344 | 125166344          | A/G            |
|                       | S7_125166395 | 125166395          | A/G            |
|                       | S7_125166437 | 125166437          | G/A            |
|                       | S7_125166495 | 125166495          | C/A            |
|                       | S7_125166940 | 125166940          | C/T            |
| <i>Zm00001d020623</i> | S7_125319616 | 125319616          | A/C            |
|                       | S7_125320422 | 125320422          | G/A            |
|                       | S7_125320782 | 125320782          | C/T            |
|                       | S7_125321596 | 125321596          | C/T            |
|                       | S7_125321635 | 125321635          | A/G            |
|                       | S7_125321649 | 125321649          | C/T            |
|                       | S7_125321749 | 125321749          | C/G            |
|                       | S7_125321983 | 125321983          | T/G            |
|                       | S7_125322584 | 125322584          | T/-            |

‘-’ represents deletion.



**Table S5** Significant SNPs overlapping with QTL for kernel moisture change identified in previous studies

| SNP           | Trait    | Associated QTL (Marker)     | Distance between<br>SNP and QTL (Kb) | QTL Function      | Reference       |
|---------------|----------|-----------------------------|--------------------------------------|-------------------|-----------------|
| SYN38588      | CDR45–55 | PZE-107014666/PZE-107082484 | –                                    | m <sub>ini</sub>  | Yin et al. [11] |
| SYN30412      | CDR45–55 | SYN30432/PZE-105040767      | 80.00                                | m <sub>fini</sub> | Yin et al. [11] |
| SYN38588      | CDR50–55 | PZE-107014666/PZE-107082484 | –                                    | m <sub>ini</sub>  | Yin et al. [11] |
| PZE-101122473 | CDR50–55 | PZE-101120411/PZE-101128157 | –                                    | t <sub>ini</sub>  | Yin et al. [11] |
| PZB01400.1    | KMC45    | PZE-101235343/SYN25670      | –                                    | m <sub>ini</sub>  | Yin et al. [11] |
|               |          | SNP_286449826               | 0.31                                 | KMC 40 DAP        | Li et al. [25]  |
| SYN8680       | KMC45    | PZE-101235343/SYN25670      | –                                    | m <sub>ini</sub>  | Yin et al. [11] |

CDR45–55 and CDR50–55 represent cob dehydration rate on the 45–55 and 50–55 days after pollination, respectively. KMC45 represents kernel moisture content on the 45th days after pollination. m<sub>ini</sub>, dehydration initial moisture. m<sub>fini</sub>, final moisture. t<sub>ini</sub>, dehydration initial time (DAP). KMC 40 DAP, kernel moisture content on the 40th days after pollination. “–” represents SNP located within the QTL.

**Table S6** Information of 241 maize inbred lines in the association panel

| Taxa   | Name      | Pedigree                             |
|--------|-----------|--------------------------------------|
| SCL001 | F19       | Derived from CIMMYT germplasm        |
| SCL003 | Zheng58   | Ye478 mutant                         |
| SCL004 | Chang7-2  | Wei95 × Huangzaosi // S901           |
| SCL005 | S273      | Derived from suwan germplasm         |
| SCL006 | Su1611    | Derived from suwan germplasm         |
| SCL008 | 5311      | Derived from suwan germplasm         |
| SCL009 | CTL26     | Derived from suwan germplasm         |
| SCL011 | 21A       | Derived from Tropical germplasm      |
| SCL014 | V37       | V37                                  |
| SCL015 | Mian7317  | Mian7317                             |
| SCL016 | Mian723   | P953 × 698-3                         |
| SCL017 | 7041-5    | Derived from Yugoslavic hybrid SC704 |
| SCL018 | NZ013-1   | Neizi013-1-1                         |
| SCL019 | Yu561     | Nongda202 × 095                      |
| SCL020 | H08-155   | H08-155                              |
| SCL021 | K169R     | Derived from American hybrid 3163    |
| SCL023 | M14       | M14                                  |
| SCL025 | B151      | Derived from Pioneer unknown hybrid  |
| SCL026 | 618       | Derived from Pioneer unknown hybrid  |
| SCL027 | 141       | Derived from Pioneer hybrid 78599    |
| SCL028 | ShuangM9  | M9 × M9B                             |
| SCL029 | P953      | Derived from hybrid 95-3             |
| SCL030 | LN8       | 478 improved line                    |
| SCL031 | HZ127-7   | Derived from American hybrid Y8G61   |
| SCL033 | ZYDH381-1 | ZYDH381-1                            |
| SCL035 | De2010-1  | De2010-1                             |
| SCL036 | End28     | 78599 improved lines                 |
| SCL038 | Mian715   | Hybrid CGT-15                        |
| SCL039 | BS08-565  | BS08-565                             |
| SCL042 | De12      | De12                                 |
| SCL043 | TD1       | 478 improved line                    |
| SCL045 | Jing07-4  | Qujing landrace                      |
| SCL046 | M89       | K22 improved line                    |
| SCL047 | H127RE    | American hybrid Y8G61                |
| SCL049 | NZ925     | NZ925                                |
| SCL050 | BS1074    | BS1074                               |
| SCL051 | Lin-1     | 478 improved line                    |
| SCL054 | S7913     | S7913                                |
| SCL055 | DH29      | Derived from Pioneer hybrid 78599    |
| SCL056 | Mo17      | C103 × 187-2                         |
| SCL059 | 2142      | Foreign hybrid Y7864                 |
| SCL060 | 205-11    | Foreign hybrid Y7865F2 × Qi205       |

|        |           |                                       |
|--------|-----------|---------------------------------------|
| SCL065 | Nan09530  | 095 × Zi330                           |
| SCL066 | 98-3      | 698-3 × 81565 // 698-3                |
| SCL067 | M232      | 65232/P6C3 // 65232                   |
| SCL068 | Du321     | American hybrid 3382                  |
| SCL070 | Nan381    | Ai351/B9001 // Ai351BC2               |
| SCL071 | 7854      | Ye478 × 156                           |
| SCL073 | ZY2247    | ZY2247                                |
| SCL074 | Q78       | Q78                                   |
| SCL075 | Nan637    | Nan637                                |
| SCL076 | Nan202    | Zong3 / Niu2-1                        |
| SCL077 | 78599-211 | Derived from Pioneer hybrid 78599     |
| SCL078 | YA3237    | Zheng32 × S37                         |
| SCL079 | JS0251    | Dan85566/E28 second circle line       |
| SCL081 | Zheng28   | Zheng28                               |
| SCL082 | Zheng22   | E28/Duqing second circle line         |
| SCL084 | Dan3130   | Derived from Pioneer hybrid 78599     |
| SCL085 | LC955     | LC955                                 |
| SCL086 | Dan599    | Derived from Pioneer hybrid 78599     |
| SCL087 | LJ-2      | American hybrid Liaojian              |
| SCL088 | Liao68    | Unknown                               |
| SCL089 | Liao7996  | 7922 / D9046                          |
| SCL090 | Liao3053  | (7922 × B68) / 5003                   |
| SCL092 | Liao7890  | 7922 / 8001                           |
| SCL094 | Wa138     | Luda Red bone germplasm               |
| SCL095 | Ji1037    | Mo17 / suwan1 // MO17                 |
| SCL096 | TS6278    | TS6278                                |
| SCL097 | ZM28      | ZM28                                  |
| SCL099 | K22       | K11 × Ye478                           |
| SCL100 | Dan9046   | 7922 × 5003                           |
| SCL101 | PHB09     | American inbred line, Reid population |
| SCL102 | CN9802    | American inbred line, Reid population |
| SCL103 | Dan598    | Dan598                                |
| SCL104 | Shen135   | Derived from Pioneer hybrid 78599     |
| SCL105 | Shen136   | Derived from Pioneer hybrid 78599     |
| SCL106 | Shen137   | Derived from Pioneer hybrid 6JK111    |
| SCL107 | SH15      | Derived from Pioneer hybrid 78599     |
| SCL108 | 871       | Derived from Pioneer hybrid 87001     |
| SCL109 | P138      | Derived from Pioneer hybrid 78599     |
| SCL110 | Qi319     | Derived from Pioneer hybrid 78599     |
| SCL111 | 178       | Derived from Pioneer hybrid 78599     |
| SCL112 | 7327      | 7327                                  |
| SCL113 | YS0       | YS0                                   |
| SCL114 | Ye478     | U8112 × Shen5003                      |
| SCL115 | 698-3     | Derived from Pioneer hybrid 78599     |

|        |          |                                                      |
|--------|----------|------------------------------------------------------|
| SCL116 | JH961    | Derived from Pioneer hybrid 78599                    |
| SCL117 | JH59     | Derived from Pioneer hybrid 78599                    |
| SCL118 | Qi205    | vAi141 × Zhongxi017 / QPM70                          |
| SCL119 | Dan340   | White bone Lu9 × glume maize                         |
| SCL120 | CA211    | CA211                                                |
| SCL121 | DYS      | DYS                                                  |
| SCL122 | Liao6082 | 5003、7922、U8112、Zheng32、N-46、B73 integrative line    |
| SCL123 | Lu2458   | Lu2458                                               |
| SCL124 | Ji477    | Mo17 radiation                                       |
| SCL125 | Zheng29  | Zheng29                                              |
| SCL126 | ZH64     | Derived from Pioneer hybrid 64                       |
| SCL127 | H921     | 78599 × (6166 + 6066 + 6165)                         |
| SCL128 | 1572     | 5003 × Luda Red bone line                            |
| SCL129 | Ji992    | Ji992                                                |
| SCL130 | 9614     | Tropical germplasm                                   |
| SCL131 | 434      | 434                                                  |
| SCL132 | H10      | Tropical germplasm                                   |
| SCL133 | 4379     | 4379                                                 |
| SCL134 | 4011     | Derived from landrace                                |
| SCL135 | HuangC   | (Huangxiao162 × Zi330 / 02) × Tuxpeno                |
| SCL136 | Tie7922  | American hybrid 3382                                 |
| SCL139 | H21      | Huangzaosi × H84                                     |
| SCL140 | 4866     | Ye478 improved line                                  |
| SCL141 | 07G83    | 07G83                                                |
| SCL142 | LJS-1    | LJS-1                                                |
| SCL144 | LZM004   | Tropical germplasm                                   |
| SCL147 | LZM025   | Tropical germplasm                                   |
| SCL148 | W8071    | Tropical germplasm                                   |
| SCL151 | QBII-1   | 1221CL13                                             |
| SCL153 | ML1108   | ML1108                                               |
| SCL154 | ML1120   | ML1120                                               |
| SCL155 | W7475    | 12127475                                             |
| SCL157 | PN0504-8 | Derived from Pioneer hybrid PN0504                   |
| SCL158 | KS001    | Derived from American hybrid X1141P                  |
| SCL160 | 5220-2   | Unknown                                              |
| SCL162 | SAM3001  | Unknown hybrid 3001                                  |
| SCL163 | 975-12   | 698-3 / unknown inbred line                          |
| SCL164 | 18-599   | Derived from Pioneer hybrid 78599                    |
| SCL166 | SCML1950 | American hybrid 441950                               |
| SCL167 | 08-641   | Derived from Pioneer hybrid Y78641                   |
| SCL168 | 48-2     | (Mo17 / Dan340) // 6 unknown lines                   |
| SCL169 | SCML103  | 698-3 / unknown line                                 |
| SCL171 | SCML203  | (48-2 × 5003)space induced mutation × foreign hybrid |
| SCL172 | LH8012   | Yunrui9 (YML46 / YML8711) second circle line         |

|        |             |                                                                |
|--------|-------------|----------------------------------------------------------------|
| SCL174 | TM012       | TM012                                                          |
| SCL175 | 1323        | Hybrid 1323                                                    |
| SCL176 | 975-13      | 698-3 / unknown line                                           |
| SCL178 | SCML2054    | Hybrid 2054                                                    |
| SCL179 | 10WRB115    | 10WRB115                                                       |
| SCL180 | 10WRA120    | 10WRA120                                                       |
| SCL181 | 08WSC51     | 08WSC51-221                                                    |
| SCL182 | 08WSC179    | 08WSC179-31                                                    |
| SCL183 | 08WSC187    | 08WSC187-211                                                   |
| SCL184 | 08WSC200    | 08WSC200-11                                                    |
| SCL185 | 08WSC204    | 08WSC204-21                                                    |
| SCL186 | 08WSC237    | 08WSC237-111                                                   |
| SCL187 | 08WSC257    | 08WSC257-122                                                   |
| SCL189 | CIMMYT-1    | CIMMYT-1                                                       |
| SCL191 | GP66-1      | Unknown                                                        |
| SCL192 | S37         | Derived from suwan1                                            |
| SCL195 | BJ005       | BJ005                                                          |
| SCL196 | 2082-11     | 2082-11                                                        |
| SCL197 | GD003       | 11GD003                                                        |
| SCL199 | XS021       | XS021                                                          |
| SCL200 | 9HT1736     | Unknown                                                        |
| SCL204 | LH7556      | LH7556                                                         |
| SCL205 | Mian04185-4 | Mian04185-43122                                                |
| SCL206 | Mian04185-8 | Mian04185-8411                                                 |
| SCL208 | SCML2031    | TF2031-2221                                                    |
| SCL209 | TY30331-3   | TY30331-35121                                                  |
| SCL210 | TY30331-2   | TY30331-25111                                                  |
| SCL211 | QA          | 178/9782                                                       |
| SCL212 | KS003       | Derived from integrative line                                  |
| SCL213 | HL5049      | HL5049                                                         |
| SCL214 | HL5054      | HL5054                                                         |
| SCL215 | LLF-08      | 08-641 backcross improved line                                 |
| SCL216 | ZD808-1     | Hybrid ZD808                                                   |
| SCL217 | 510317      | Hybrid 510317                                                  |
| SCL218 | Dan4245     | Liao7980 / Dan598                                              |
| SCL219 | PZ1010-2    | PZ1010-2                                                       |
| SCL221 | JD7275      | Hybrid JD7275                                                  |
| SCL222 | JY01-3      | Hybrid JY01                                                    |
| SCL223 | Y0827       | SN203 / SN204 / SC9911 / DK656 / CS9906 integrative line       |
| SCL227 | Y1021       | Ye478 / 5003 / 7922 / Du32 / Cheng687 / 698-3 integrative line |
| SCL228 | Y1022       | Ye478 / 5003 / 7922 / Du32 / Cheng687 / 698-3 integrative line |
|        |             | 273 / CH01-1112 / 634-1112 / 698-3 / Cheng687 / 7932-1211 /    |
| SCL229 | Y1032W      | 5003 / 18-599 / Hai92-1 integrative line                       |

|        |            |                                                                |
|--------|------------|----------------------------------------------------------------|
|        |            | 273 / CH01-1112 / 634-1112 / 698-3 / Cheng687/7932-1211 / 5003 |
| SCL230 | Y1032R     | / 18-599 / Hai92-1 integrative line                            |
| SCL231 | Y1035      | 08-641 natural abnormal plant                                  |
| SCL232 | Y1038      | 08-641 natural abnormal plant                                  |
| SCL233 | Y1111      | Y1111                                                          |
| SCL235 | Y1027      | Derived from integrative line W1030                            |
| SCL240 | 77         | 77                                                             |
| SCL243 | 10WRC64    | 10WRC64                                                        |
| SCL245 | PI43W      | PI43W                                                          |
| SCL246 | W8199      | 11278199                                                       |
| SCL247 | Y1114      | Tropical integrative line AP5                                  |
| SCL248 | LX312      | LX312                                                          |
| SCL250 | DH3732     | Denghai hybrid DH3732                                          |
| SCL253 | BML1269    | BML1269                                                        |
| SCL254 | Y1216      | Y1216                                                          |
| SCL255 | LM-6       | LM-6                                                           |
| SCL257 | BML1243    | BML1243                                                        |
| SCL258 | BML1234    | BML1234                                                        |
| SCL259 | Y1224      | Y1224                                                          |
| SCL260 | 1217 8107  | 1217 8107                                                      |
| SCL261 | BML1228    | BML1228                                                        |
| SCL262 | 08WSC166   | 08WSC166-1211                                                  |
| SCL263 | LX350      | LX350                                                          |
| SCL264 | Y1217      | Y1217                                                          |
| SCL265 | XBY2193    | SUWAN germplasm                                                |
| SCL268 | U8112      | Hybrid3382                                                     |
| SCL272 | LS-22      | LS-22                                                          |
| SCL273 | CD30M      | Hybrid CGT-15                                                  |
| SCL275 | XH05       | Yunnan White XH05 × American hybrid                            |
| SCL276 | 06WAM210   | CIMMYT line                                                    |
| SCL281 | GCML152    | CIMMYT line                                                    |
| SCL282 | GCML157    | CIMMYT line                                                    |
| SCL283 | MX714      | YA3237 / CIMMYT hybrid                                         |
| SCL284 | DH40       | DH40                                                           |
| SCL289 | CLWN201    | CIMMYT line                                                    |
| SCL304 | CML282     | CIMMYT line                                                    |
| SCL307 | CML379     | CIMMYT line                                                    |
|        | TL98A1709- |                                                                |
| SCL310 | 20         | CIMMYT line                                                    |
| SCL311 | TL96B      | CIMMYT line                                                    |
| SCL318 | BANTAN2003 | CIMMYT line                                                    |
| SCL319 | CG698C102  | 698-3 improved line                                            |
| SCL320 | CG921      | Hai921 improved line                                           |
| SCL322 | Lian87     | Lian87                                                         |

|        |         |                                                          |
|--------|---------|----------------------------------------------------------|
| SCL324 | K305    | American hybrid 2021                                     |
| SCL325 | 811     | Derived from 136-87mutant                                |
| SCL326 | K363    | 48-2 × 156                                               |
| SCL330 | 81565   | Miandan 8 parent Mobai                                   |
| SCL332 | WZ-1    | W1 Wanzhou                                               |
| SCL333 | PB80    | 1067-1 × B73 / B73Ht.1 BC6, SS                           |
| SCL335 | 793     | 235 / B73, SS                                            |
| SCL337 | PHV63   | 555 × Zap < 4CB, NSS                                     |
| SCL338 | PHW65   | (861 / 595) × 8211131X, NSS                              |
| SCL339 | 2369    | 2702H × B73) × B73, SS                                   |
| SCL341 | PHW52   | (B73 / G39) × 411242X, SS                                |
| SCL342 | CA1108  | Huangzaosi improved line                                 |
| SCL343 | Nan21-3 | Yugoslavic hybrid BC8241Ht                               |
| SCL344 | PH6WC   | PH01N × PH09B, Reid population                           |
| SCL345 | PH4CV   | PH7V0 × PHBE2, Lancaster population                      |
| SCL346 | Xun9058 | 6JK × 8085 Thailand                                      |
| SCL347 | LX9801  | 502 × H21                                                |
| SCL348 | C24     | C24                                                      |
| SCL349 | C09-1   | 09-1                                                     |
| SCL351 | ZNC-4   | Unknown                                                  |
| SCL352 | Qi533   | Derived from P136 abnormal plant                         |
| SCL353 | L6201   | 08-641 improved line                                     |
| SCL354 | LSC127  | LSC127                                                   |
| SCL355 | W30     | K22 improved line                                        |
| SCL356 | B73     | BSSS C5                                                  |
| SCL358 | W3189   | 18-599 improved line                                     |
| SCL359 | 9782    | (48-2 × 5003) space induced mutant × foreign hybrid line |

---
